# Supplementary material for: The crystal structure and oxygen reduction reaction of Ni(ii)-complex templated borate-sulfate and borate
Source: Royal Society of Chemistry journal article supplement (doi:10.1039/d2dt00213b), 2022-01-01
Supplement: d2dt00213b1.pdf [file d2dt00213b1.pdf]

## Supporting Information

### Crystal structure and oxygen reduction reaction of Ni(II) complex template Borate-sulfate and Borate

Shu-Sheng Xin<sup>a</sup>, Yan-Ling Deng<sup>a</sup> and Chun-Yang Pan<sup>\*a</sup>

<sup>a</sup> School of Chemical Engineering and Light Industry, Guangdong University of Technology, Guangzhou, Guangdong 510006, China; Tel: +86-020-39322231 Fax: +86-020-39322231.

\*Corresponding author: Chun-Yang Pan, E-mail: panchuny@gdut.edu.cn

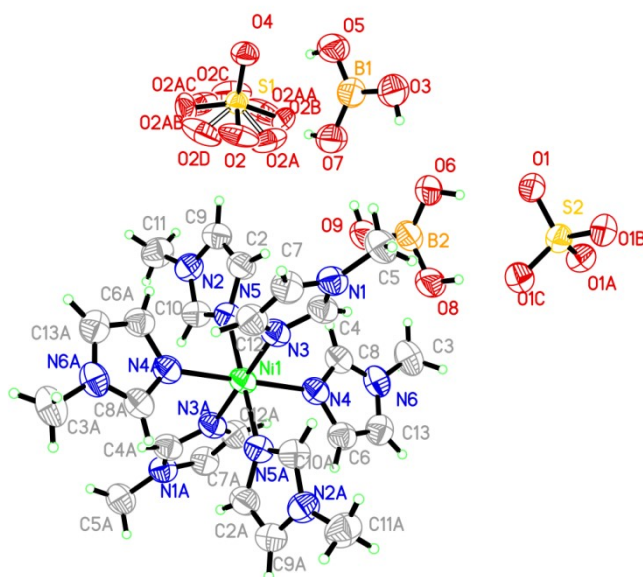

Fig. S1 ORTEP view of 1 made at the 30% probability level.

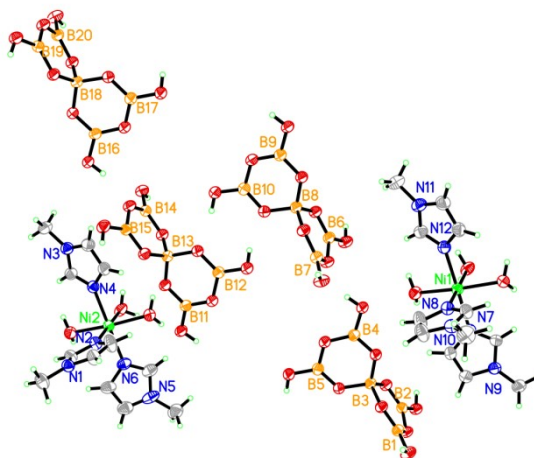

Fig. S2 ORTEP view of 2 made at the 30% probability level; C (gray), O (red), and H (white).

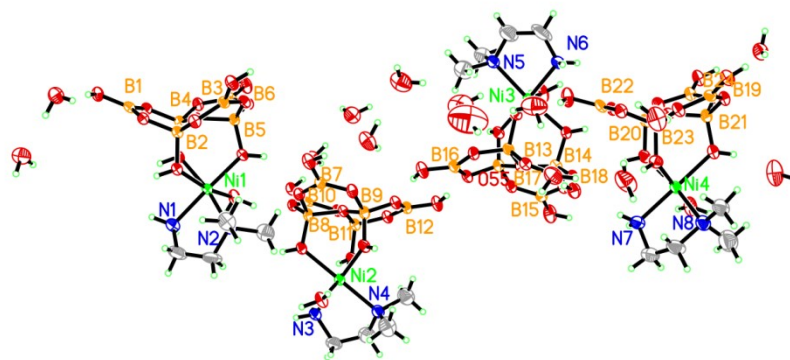

**Fig. S3** ORTEP view of **3** made at the 30% probability level; C (gray), O (red), and H (white).

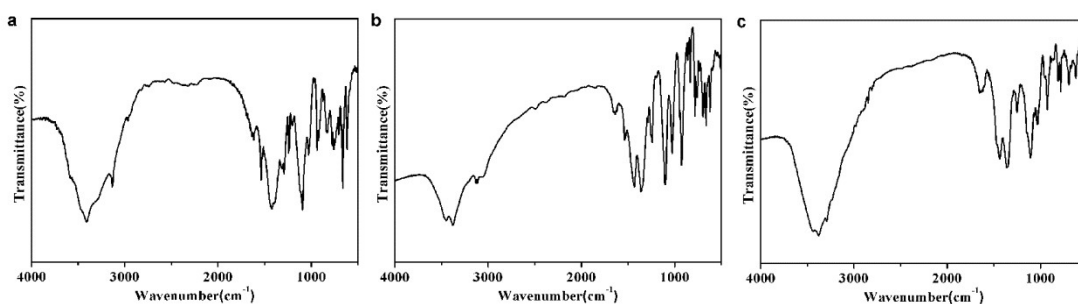

**Fig. S4** The FTIR spectra of compound **1–3**.

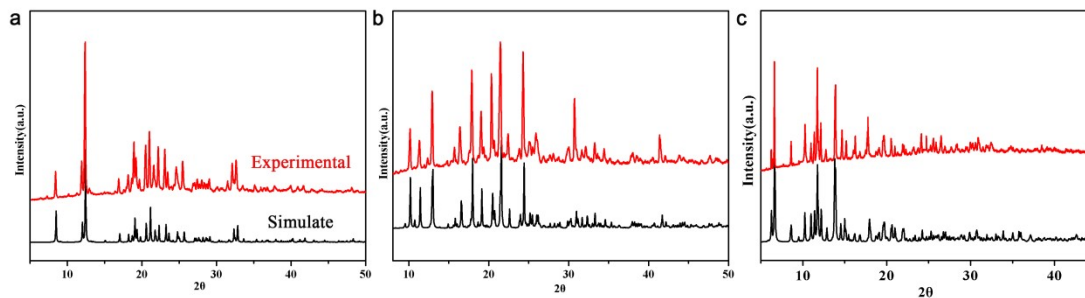

**Fig. S5** The PXRD patterns of compound **1** (a), **2** (b) and **3** (c).

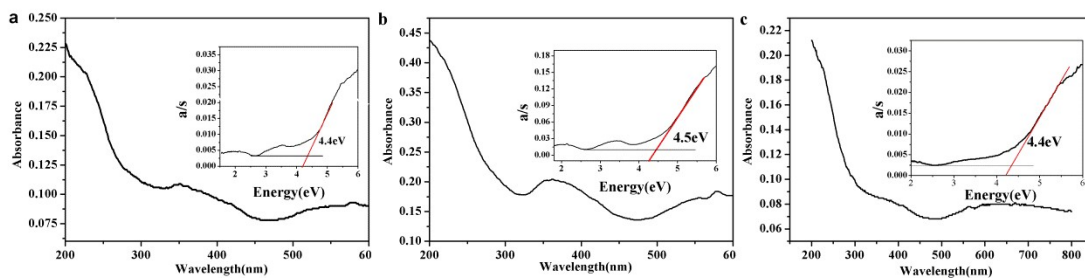

**Fig. S6** The solid-state UV-vis absorption spectra of compound **1**(a), **2**(b) and **3** (c) (the insets show the Tauc plots of  $\alpha/S$  vs. photon energy).

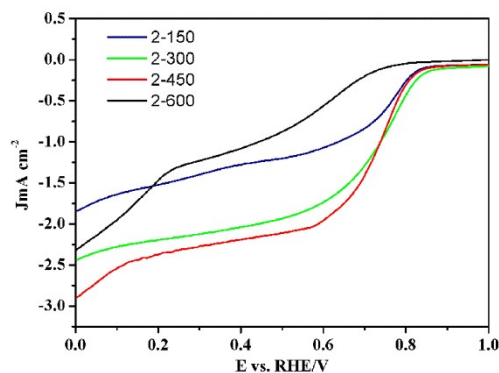

**Fig. S7** LSV curves of 2-150, 2-300, 2-450 and 2-600 (5 mV/s, 1600 rpm). The LSV curve of 2-450 presented an  $E_{1/2}$  at the potential of 0.74 V.

**Table S1** Details of hydrogen bond for **1**.

| D—H...A                  | d(D—H)(Å) | d(H—A)/Å | d(D—A)/Å | D—H—A/° |
|--------------------------|-----------|----------|----------|---------|
| O4—H4...O3               | 0.84      | 1.87     | 2.684(2) | 164.4   |
| O5—H5A...O3 <sup>1</sup> | 0.84      | 1.92     | 2.749(2) | 171.6   |
| O6—H6A...O7              | 0.84      | 1.91     | 2.749(3) | 174.4   |
| O7—H7A...O1              | 0.84      | 2.02     | 2.79(2)  | 153.4   |
| O7—H7A...O1A             | 0.84      | 1.69     | 2.509(7) | 165.6   |
| O8—H8...O4               | 0.84      | 1.97     | 2.782(3) | 162.8   |
| O9—H9A...O2              | 0.84      | 2.06     | 2.880(2) | 163.3   |

<sup>1</sup>1-Y, -1/2+X, 1-Z

**Table S2** Details of hydrogen bond for **2**.

| D—H...A                     | d(D—H)(Å) | d(H—A)/Å | d(D—A)/Å | D—H—A/° |
|-----------------------------|-----------|----------|----------|---------|
| O1—H1...O14 <sup>5</sup>    | 0.84      | 1.91     | 2.739(2) | 169.3   |
| O3—H3A...O15 <sup>6</sup>   | 0.84      | 1.87     | 2.708(2) | 173.2   |
| O8—H8A...O34 <sup>7</sup>   | 0.84      | 1.88     | 2.717(2) | 171.6   |
| O10—H 10A...O12             | 0.84      | 1.92     | 2.695(2) | 152.8   |
| O11—H11A...O5 <sup>5</sup>  | 0.84      | 1.96     | 2.784(2) | 167.4   |
| O13—H13...O4 <sup>6</sup>   | 0.84      | 2.05     | 2.874(2) | 167.9   |
| O18—H18A...O24              | 0.84      | 1.95     | 2.785(2) | 171.5   |
| O20—H20...O2 <sup>8</sup>   | 0.84      | 1.92     | 2.736(2) | 164.4   |
| O21—H21A...O39 <sup>7</sup> | 0.84      | 1.95     | 2.710(2) | 150.9   |

|                             |      |      |          |       |
|-----------------------------|------|------|----------|-------|
| O23—H23A...O17              | 0.84 | 1.88 | 2.697(2) | 164.7 |
| O28—H28...O27 <sup>9</sup>  | 0.84 | 1.98 | 2.807(2) | 169.6 |
| O30—H30...O26 <sup>10</sup> | 0.84 | 1.99 | 2.810(2) | 165.4 |
| O31—H31...O29               | 0.84 | 1.89 | 2.706(2) | 164.0 |
| O33—H33...O6 <sup>8</sup>   | 0.84 | 1.93 | 2.766(2) | 173.4 |
| O38—H38...O37 <sup>11</sup> | 0.84 | 1.91 | 2.750(2) | 173.0 |
| O40—H40...O36 <sup>12</sup> | 0.84 | 1.92 | 2.753(2) | 175.3 |
| O42—H42A...O40 <sup>4</sup> | 0.88 | 1.99 | 2.851(2) | 165.8 |
| O45—H45A...O1 <sup>2</sup>  | 0.88 | 2.02 | 2.853(2) | 159.4 |

<sup>1</sup>1/2+X,3/2-Y,1/2+Z; <sup>2</sup>2-X,1-Y,1-Z; <sup>3</sup>1/2+X,3/2-Y,-1/2+Z; <sup>4</sup>1/2-X,-1/2+Y,1/2-Z; <sup>5</sup>3/2-X,-1/2+Y,1/2-Z; <sup>6</sup>3/2-X,1/2+Y,1/2-Z; <sup>7</sup>1+X,+Y,+Z; <sup>8</sup>-1+X,+Y,+Z; <sup>9</sup>1-X,1-Y,1-Z; <sup>10</sup>1-X,2-Y,1-Z; <sup>11</sup>-X,1-Y,1-Z; <sup>12</sup>-X,2-Y,1-Z

**Table S3** Details of hydrogen bond for **3**.

| D—H...A                     | d(D—H)(Å) | d(H—A)/Å | d(D—A)/Å | D—H—A/° |
|-----------------------------|-----------|----------|----------|---------|
| O1—H1...O66                 | 0.84      | 1.91     | 2.728    | 165.9   |
| O5—H5...O48 <sup>1</sup>    | 0.84      | 1.93     | 2.770    | 175.2   |
| O8—H8...O15 <sup>2</sup>    | 0.88      | 2.18     | 2.876    | 136.5   |
| O11—H11...O24               | 0.88      | 1.90     | 2.769    | 175.1   |
| O12—H12...O19 <sup>2</sup>  | 0.84      | 1.93     | 2.756    | 167.4   |
| O13—H13...O9 <sup>3</sup>   | 0.84      | 1.88     | 2.723    | 177.0   |
| O14—H14A...O12 <sup>2</sup> | 0.87      | 2.14     | 2.775    | 129.2   |
| O14—H14B...O22              | 0.88      | 2.01     | 2.709    | 136.0   |
| O15—H15...O68               | 0.84      | 1.84     | 2.632    | 155.7   |
| O18—H18...O33               | 0.84      | 1.93     | 2.765    | 177.5   |
| O24—H24...O65               | 0.84      | 1.96     | 2.763    | 160.3   |
| O26—H26...O58 <sup>4</sup>  | 0.84      | 1.94     | 2.750    | 162.9   |
| O27—H27...O1 <sup>2</sup>   | 0.84      | 2.02     | 2.851    | 168.3   |
| O42—H42...O60               | 0.84      | 1.98     | 2.802    | 165.4   |
| O45—H45...O6 <sup>1</sup>   | 0.84      | 1.91     | 2.747    | 175.8   |
| O51—H51...O56               | 0.81      | 2.01     | 2.802    | 167.5   |
| O53—H53...O57               | 0.87      | 1.95     | 2.797    | 164.3   |
| O54—H54...O59               | 0.87      | 2.02     | 2.870    | 164.3   |
| O55—H55B...O18 <sup>5</sup> | 0.87      | 2.09     | 2.840    | 144.5   |

|                             |      |      |       |       |
|-----------------------------|------|------|-------|-------|
| O29—H29...O21               | 0.84 | 1.84 | 2.671 | 172.1 |
| O32—H32...O61               | 0.84 | 1.90 | 2.717 | 165.7 |
| O38—H38...O37 <sup>5</sup>  | 0.84 | 1.92 | 2.718 | 158.2 |
| O39—H39...O51 <sup>6</sup>  | 0.84 | 1.94 | 2.767 | 170.3 |
| O40—H40...O46               | 0.88 | 2.04 | 2.847 | 151.8 |
| O41—H41A...O40 <sup>6</sup> | 0.87 | 1.98 | 2.760 | 149.1 |
| O41—H41B...O49 <sup>6</sup> | 0.87 | 2.01 | 2.843 | 161.2 |
| O70—H70...O42               | 0.88 | 1.95 | 2.746 | 148.4 |
| O62—H62A...O63              | 0.87 | 2.02 | 2.620 | 125.6 |
| O65—H65A...O64              | 0.87 | 1.90 | 2.770 | 175.9 |
| O67—H67A...O4 <sup>7</sup>  | 0.87 | 2.01 | 2.876 | 171.1 |
| O67—H67B...O16 <sup>2</sup> | 0.87 | 1.94 | 2.786 | 162.4 |
| O69—H69B...O66 <sup>3</sup> | 0.87 | 2.15 | 2.853 | 137.9 |
| O61—H61A...O31 <sup>4</sup> | 0.87 | 2.02 | 2.873 | 166.2 |
| O61—H61B...O59              | 0.87 | 1.92 | 2.779 | 169.1 |
| O64—H64A...O63              | 0.87 | 1.95 | 2.666 | 139.3 |
| O64—H64B...O43 <sup>1</sup> | 0.87 | 1.99 | 2.846 | 169.5 |
| O66—H66A...O68 <sup>8</sup> | 0.87 | 1.97 | 2.812 | 161.1 |
| O66—H66B...O67              | 0.87 | 1.90 | 2.759 | 170.1 |
| O58—H58A...O64 <sup>1</sup> | 0.87 | 2.09 | 2.810 | 140.2 |
| O58—H58B...O44              | 0.87 | 1.91 | 2.741 | 160.1 |
| O68—H68A...O2 <sup>9</sup>  | 0.90 | 1.90 | 2.770 | 163.0 |
| O68—H68B...O69              | 0.87 | 1.87 | 2.733 | 173.5 |
| O59—H59A...O58              | 0.87 | 2.14 | 2.826 | 135.7 |
| O60—H60A...O62              | 0.87 | 2.00 | 2.680 | 133.8 |
| O60—H60B...O61              | 0.87 | 1.99 | 2.815 | 156.9 |
| O63—H63A...O60 <sup>1</sup> | 0.87 | 2.26 | 2.813 | 121.0 |
| O63—H63B...O30              | 0.87 | 1.96 | 2.806 | 163.2 |

---

<sup>1</sup>-X, 1-Y, 1-Z; <sup>2</sup>1-X, 1-Y, -Z; <sup>3</sup>-X, 1-Y, -Z; <sup>4</sup>1-X, 1-Y, 1-Z; <sup>5</sup>1-X, 2-Y, 1-Z; <sup>6</sup>-X, 2-Y, 1-Z; <sup>7</sup>1-X, -Y, -Z; <sup>8</sup>+X, -1+Y, +Z; <sup>9</sup>+X, 1+Y, +Z
